# Supplementary material for: Activated carbon fiber modified with hyperbranched polyethylenimine and phytic acid for the effective adsorption and separation of In(iii)
Source: Royal Society of Chemistry journal article supplement (doi:10.1039/d2nj03111f), 2022-01-01
Supplement: d2nj03111f1.pdf [file d2nj03111f1.pdf]

## Support Information

### Activated carbon fiber modified with hyperbranched polyethylenimine and phytic acid for effective adsorption and separation of In(III)

Xuezhen Gao, Zhiyong Cao, Changzhen Li, Junshen Liu\*, Xunyong Liu, and Lei Guo  
*School of Chemistry & Materials Science, Ludong University, Yantai 264025,  
Shandong province, China*

#### Contents

**Fig. S1.** SEM images of adsorbents (a: ACF; b: OACF; c: HPEI-OACF; d:  
PA-HPEI-OACF).

**Fig. S2.** Reusability of PA-HPEI-OACF.

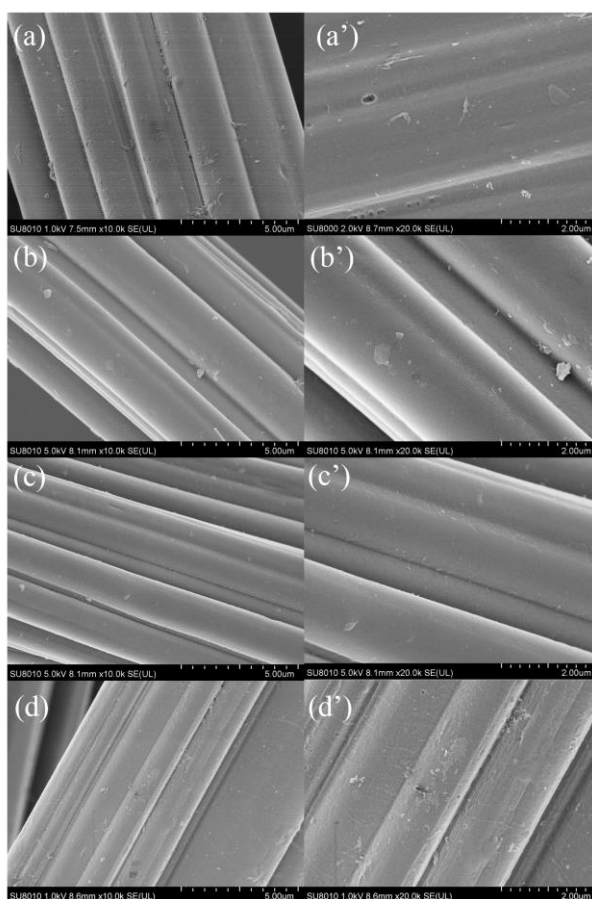

**Fig. S1.** SEM images of adsorbents (a, a': ACF; b, b': OACF; c, c': HPEI-OACF; d,  
d': PA-HPEI-OACF).

\* Correspondence author: Fax: +86 535 6697537.  
Email address: liujunshen@163.com; lduies@163.com(J. LIU)

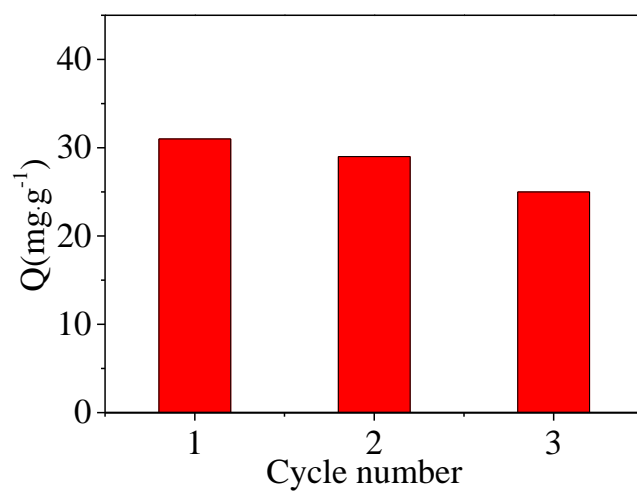

**Fig. S2.** Reusability of PA-HPEI-OACF.
